# Supplementary material for: ORCHIDEE-SOM: modeling soil organic carbon (SOC) and dissolved organic carbon (DOC) dynamics along vertical soil profiles in Europe
Source: Copernicus journal article supplement (doi:10.5194/gmd-11-937-2018), 2018-03-15
Supplement: Supplementary file 1 [file gmd-11-937-2018-supplement.pdf]

Supplement of Geosci. Model Dev., 11, 937–957, 2018  
<https://doi.org/10.5194/gmd-11-937-2018-supplement>  
© Author(s) 2018. This work is distributed under  
the Creative Commons Attribution 4.0 License.

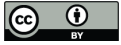

*Supplement of*

## **ORCHIDEE-SOM: modeling soil organic carbon (SOC) and dissolved organic carbon (DOC) dynamics along vertical soil profiles in Europe**

**Marta Camino-Serrano et al.**

*Correspondence to:* Marta Camino-Serrano (martacs32@gmail.com) and Bertrand Guenet (bertrand.guenet@lsce.ipsl.fr)

The copyright of individual parts of the supplement might differ from the CC BY 4.0 License.

### 1. Statistical relationship for $K_D$ based on soil properties

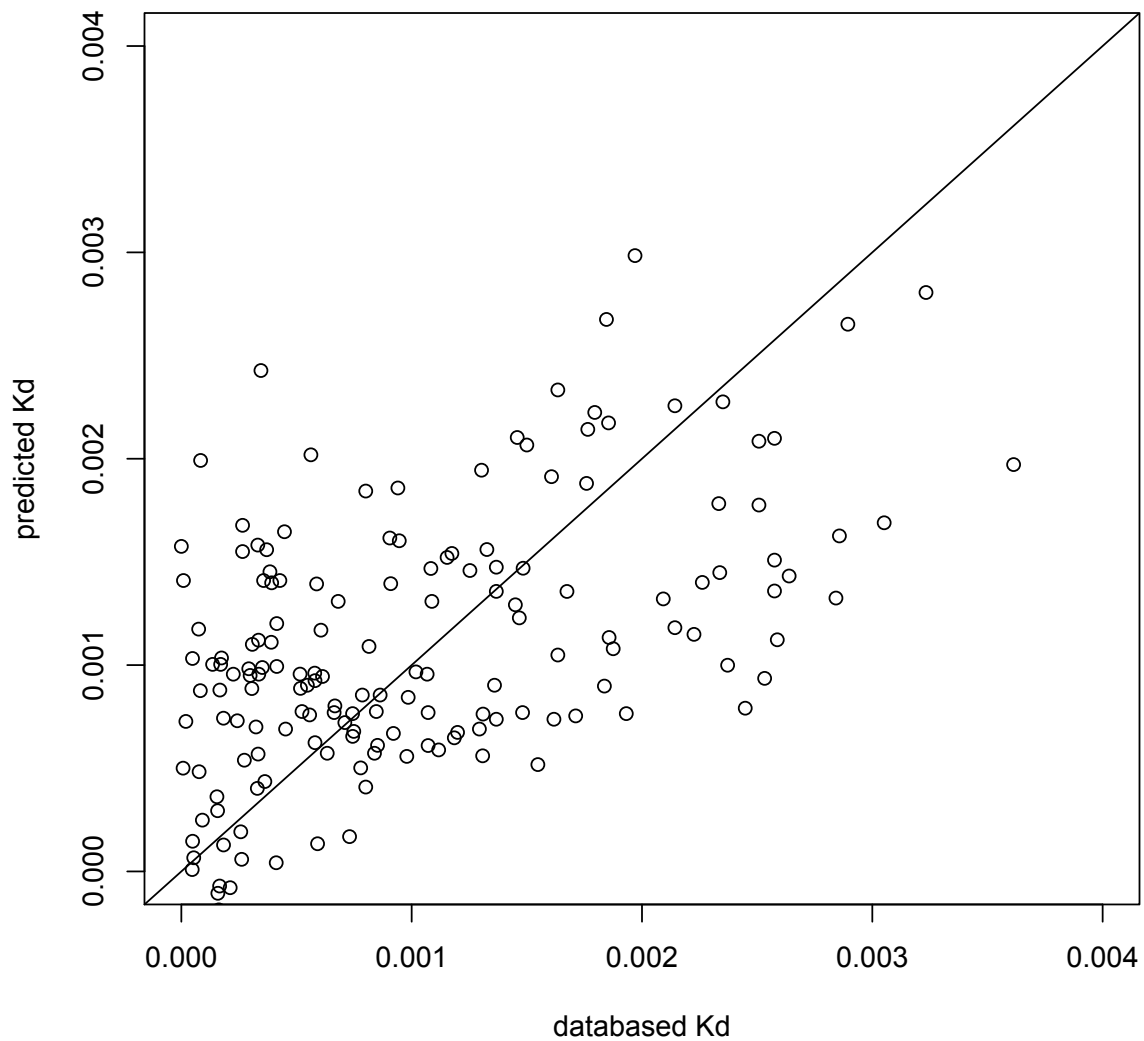

Figure S1. Measured (Kaiser et al., 1996) and modelled (Eq. 15 in manuscript) distribution coefficient  $K_D$  as a function of clay and pH. The line is the 1:1 line.

## 2. Measured versus modelled soil water content (SWC)

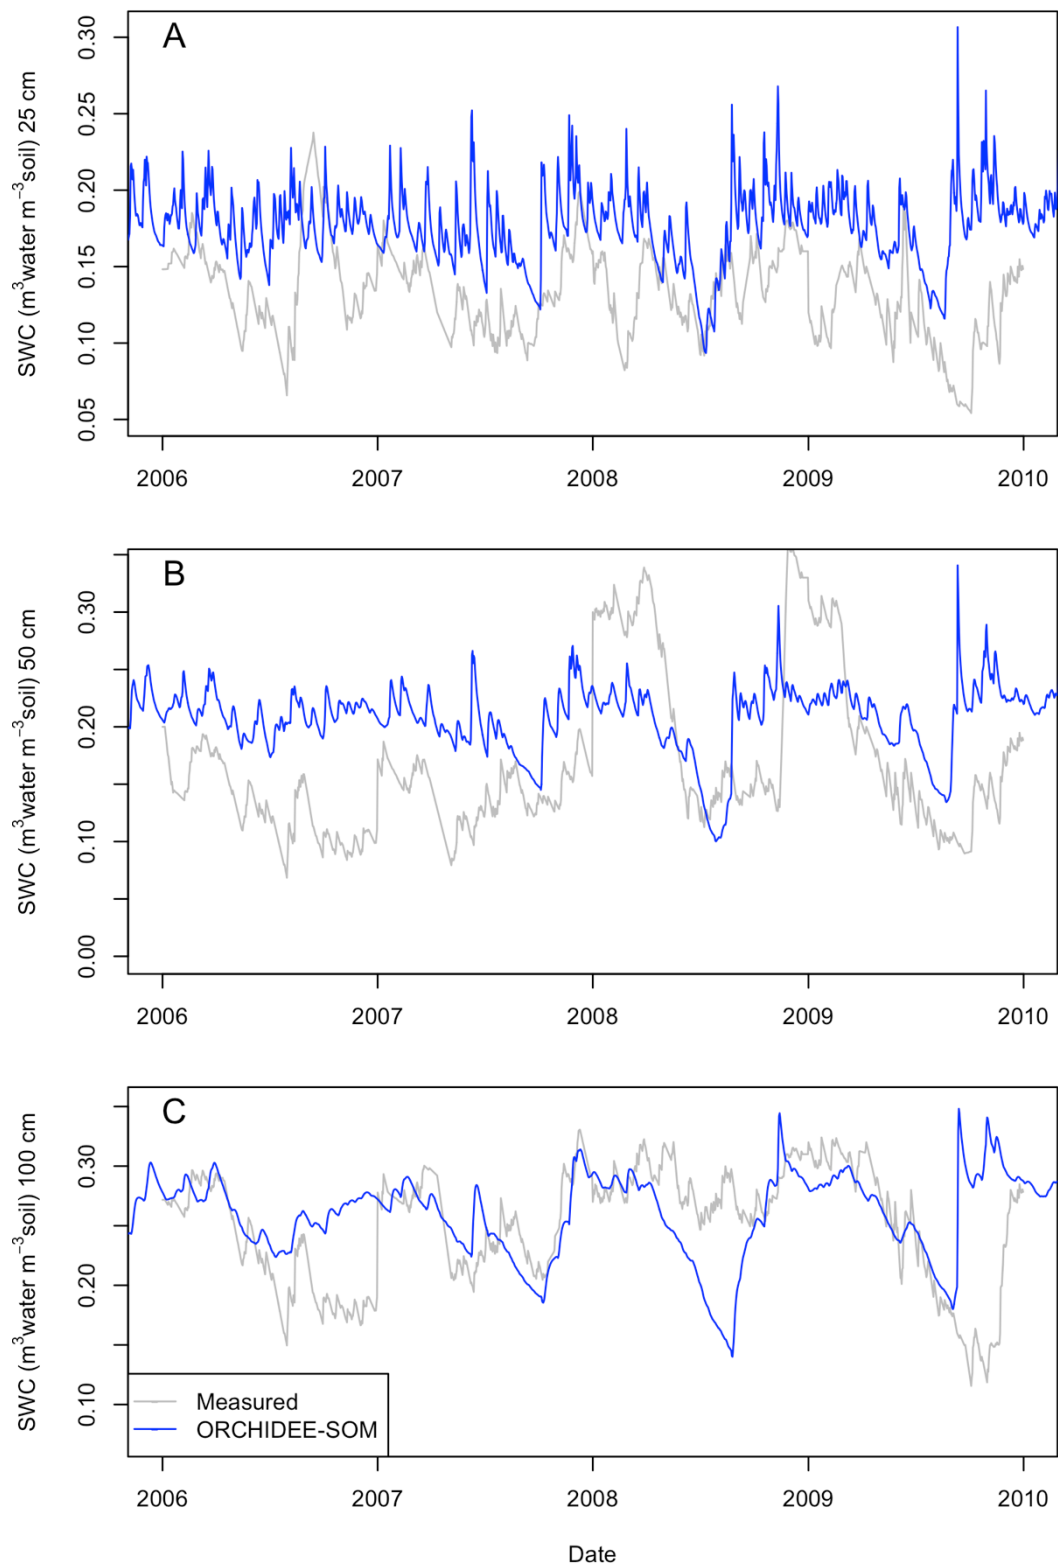

Figure S2. Measured versus modelled soil water content (SWC) for Brasschaat at three soil depths: A) 25 cm, B) 50 cm, C) 100 cm

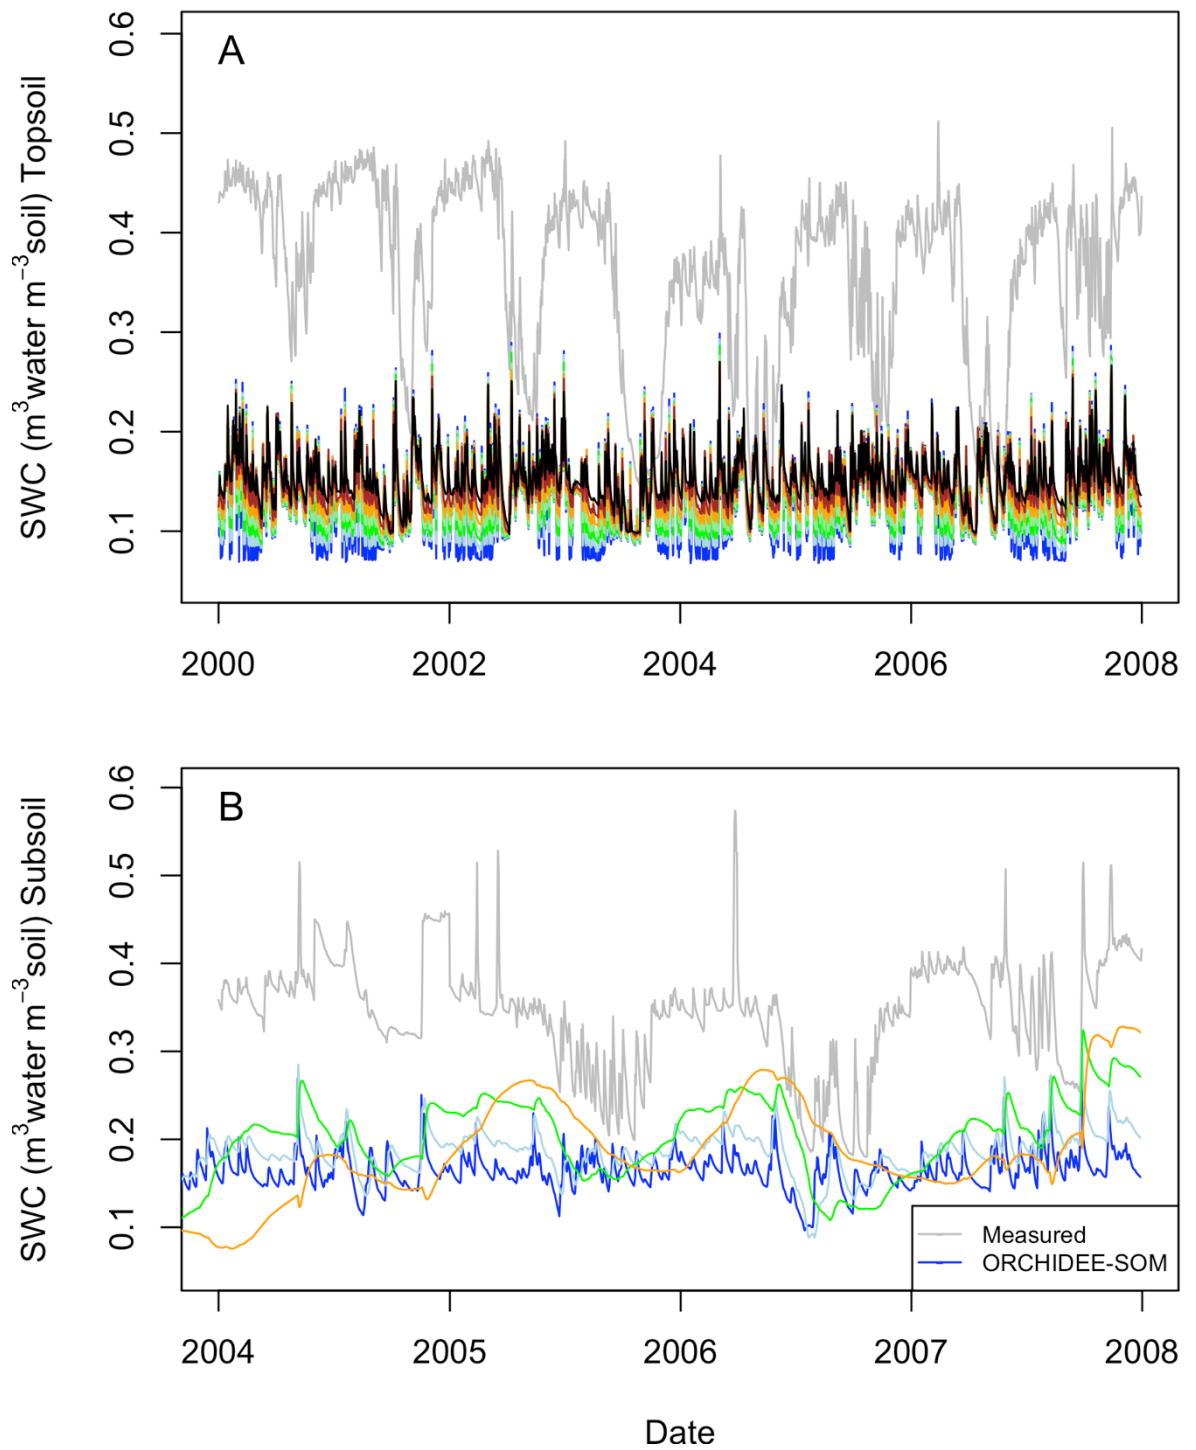

Figure S3. Measured (from FLUXNET dataset) versus modelled soil water content (SWC) for Hainich at two different horizons: A) Topsoil, B) Subsoil. Different colours show SWC modelled by ORCHIDEE from 0 to 20 cm for the topsoil and from 20 to 200 cm for the subsoil.

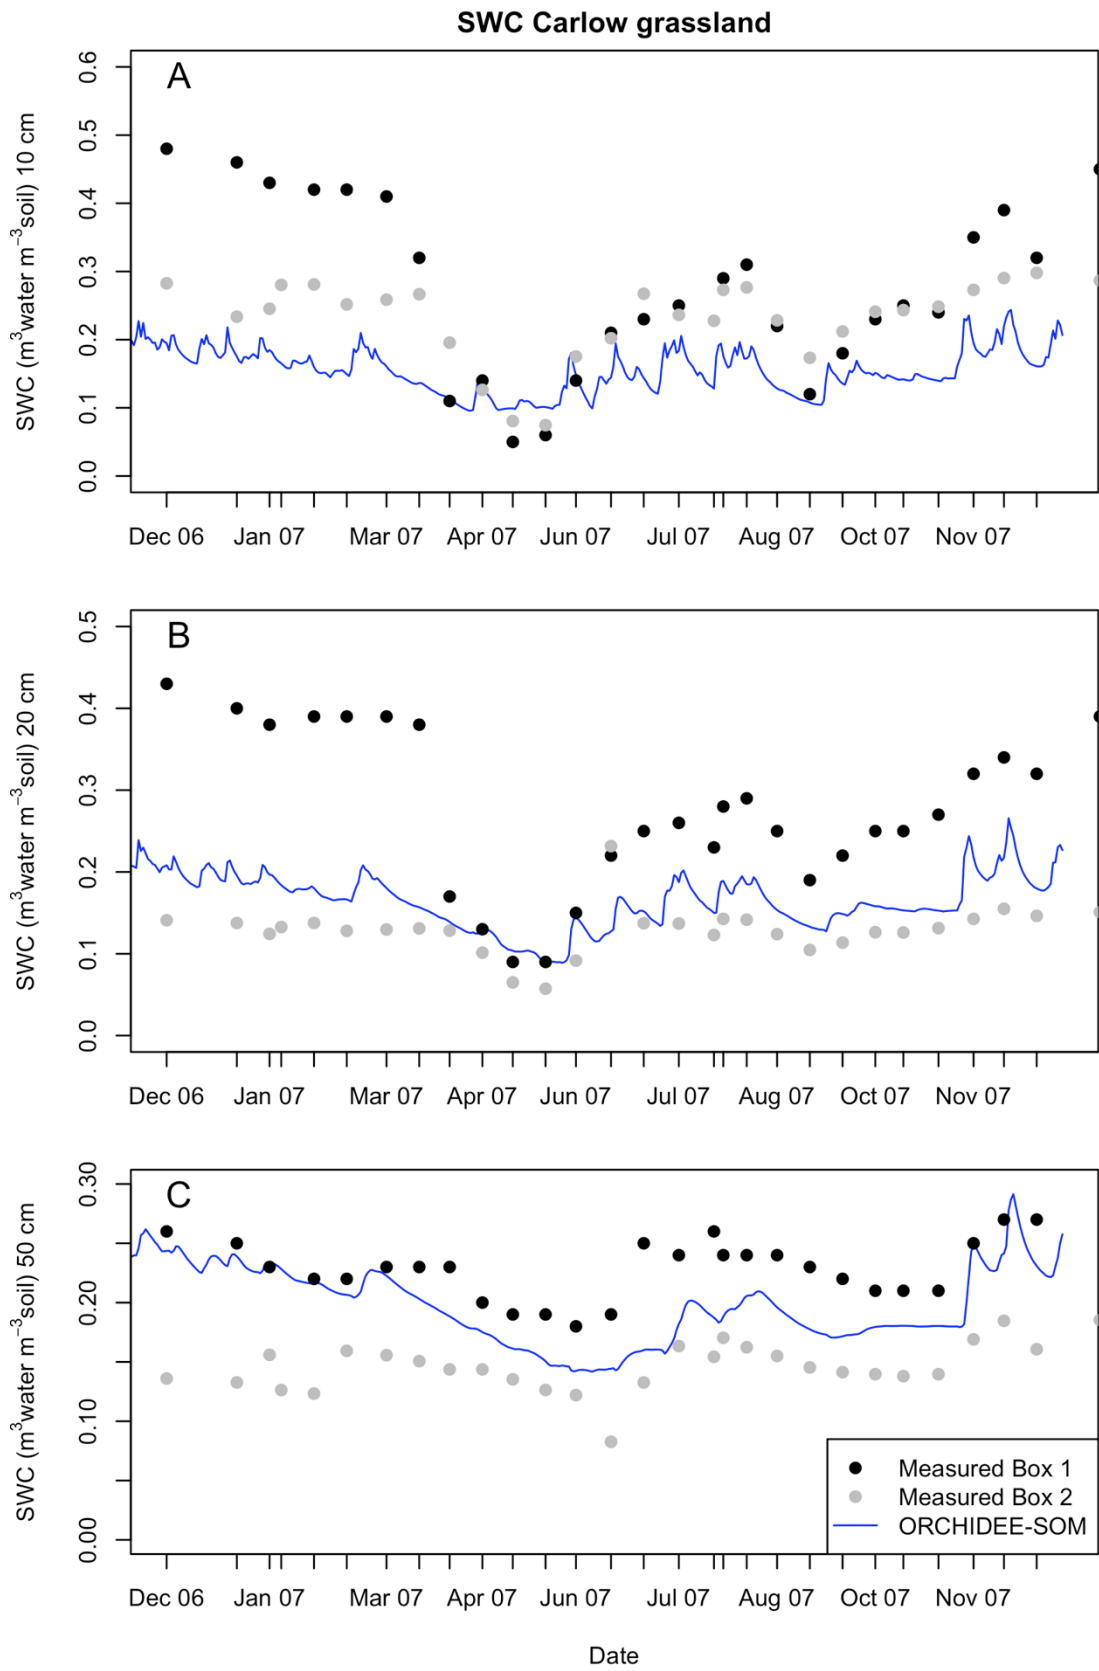

Figure S4. Measured versus modelled soil water content in Carlow grassland at three depths: A) 10 cm, B) 20 cm, C) 50 cm

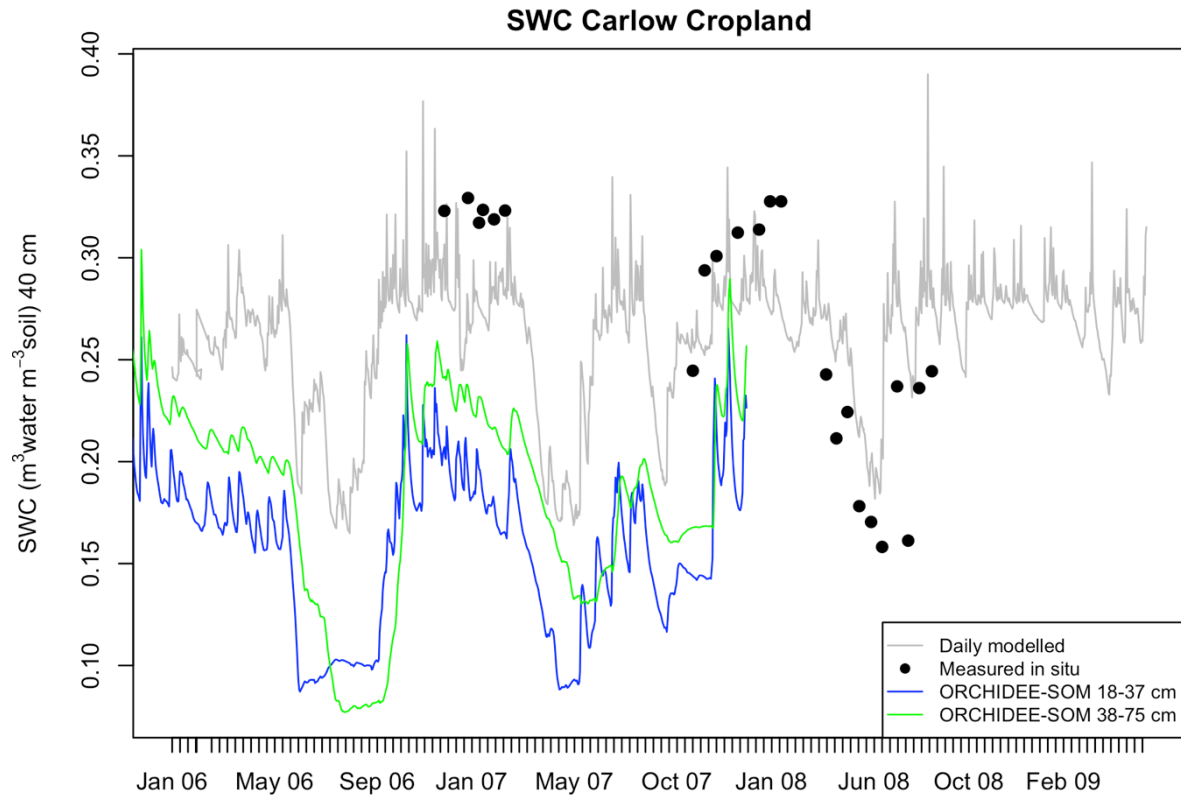

Figure S5. Measured versus modelled soil water content in Carlow cropland. The grey line indicates the soil water content modelled using a soil capacity soil water model (Kindler et al., 2011; Walmsley et al., 2011)

### 3. Optimization of the GPP-related parameters

Table S1. Values of the optimized parameters before and after the optimization.

| Site               | Parameter                                                      | Prior value | Optimized value |
|--------------------|----------------------------------------------------------------|-------------|-----------------|
| Braaschaat         | Maximum LAI                                                    | 5.0         | 6.81            |
|                    | Threshold of LAI below which plant uses carbohydrate reserves  | 0.5         | 0.42            |
|                    | Specific Leaf Area                                             | 0.009       | 0.014           |
|                    | Maximum temperature for photosynthesis                         | 55.0        | 57.22           |
|                    | Minimum temperature for photosynthesis                         | -4.0        | 0.93            |
|                    | Maximum rate of Rubisco activity-limited carboxylation at 25°C | 35.0        | 23.57           |
| Hainich            | Maximum LAI                                                    | 5.0         | 6.24            |
|                    | Threshold of LAI below which plant uses carbohydrate reserves  | 0.5         | 0.66            |
|                    | Specific Leaf Area                                             | 0.026       | 0.032           |
|                    | Maximum temperature for photosynthesis                         | 55.0        | 57.02           |
|                    | Minimum temperature for photosynthesis                         | -4.0        | -6.03           |
|                    | Maximum rate of Rubisco activity-limited carboxylation at 25°C | 55.0        | 38.87           |
| Carlow<br>Cropland | Maximum LAI                                                    | 5.0         | 3.26            |
|                    | Threshold of LAI below which plant uses carbohydrate reserves  | 0.5         | 0.40            |
|                    | Specific Leaf Area                                             | 0.026       | 0.018           |
|                    | Maximum temperature for photosynthesis                         | 55.0        | 54.18           |
|                    | Minimum temperature for photosynthesis                         | -4.0        | -3.95           |
|                    | Maximum rate of Rubisco activity-limited carboxylation at 25°C | 70.0        | 55.46           |

#### 4. RMSE and NRMSE values

Table S2. Comparison of mean monthly DOC ( $\text{mg L}^{-1}$ ) and standard deviations (%) from measurements and from ORCHIDEE-SOM. The root-mean-square error (RMSE) and the normalized root-mean-square error (NRMSE) by the mean value of the measurements are reported. The goodness of fit classification is based on criteria described in section 2.3.3.

| Site                   | Depth (cm) | Mean measured DOC | SD measurements | Mean modelled DOC | RMSE | NRMSE (%) | Goodness of fit |
|------------------------|------------|-------------------|-----------------|-------------------|------|-----------|-----------------|
| Brasschaat             | 10         | 39.2              | 31              | 127.3             | 89.3 | 227.8     | Bad             |
| Brasschaat             | 35         | 30.4              | 31              | 33.7              | 10.5 | 34.5      | Good            |
| Brasschaat             | 75         | 22.3              | 19              | 9.9               | 13   | 58.3      | Fair            |
| Hainich                | 5          | 16.7              | 34              | 17.5              | 5    | 29.9      | Very good       |
| Hainich                | 10         | 9.2               | 34              | 5.5               | 5.4  | 58.7      | Good            |
| Hainich                | 20         | 6.6               | 57              | 3.1               | 5.5  | 83.3      | Good            |
| Carlow Grassland Box 1 | 10-30      | 8.5               | 31              | 13.3              | 5.6  | 65.9      | Fair            |
| Carlow Grassland Box 1 | 60-75      | 3.6               | 26              | 2.8               | 1.4  | 38.9      | Good            |
| Carlow Grassland Box 2 | 10-30      | 14.2              | 28              | 13.3              | 4.75 | 33.5      | Good            |
| Carlow Grassland Box 2 | 60-75      | 6.3               | 24              | 2.8               | 3.1  | 49.2      | Good            |
| Carlow Cropland        | 30-40      | 4.2               | 23              | 4                 | 1.2  | 28.6      | Good            |
| Carlow Cropland        | 30-40      | 4.2               | 23              | 1.6               | 3    | 71.4      | Fair            |



## 5. Model sensitivity to parameter changes

In order to test the sensitivity of the model to the SOC and DOC residence times and diffusion coefficients, we perform a set of simulations varying such parameters (Table S1). The selection of the parameter values is based on literature or prior knowledge.

Table S3. Parameter values used for each simulation of the sensitivity test

| Simulation          | CUE              | DOC_TAU          | Carbon_tau_active | Carbon_tau_slow | Carbon_tau_passive | Dif         | D_DOC       |
|---------------------|------------------|------------------|-------------------|-----------------|--------------------|-------------|-------------|
| Reference (default) | 0.5 <sup>1</sup> | 1.3 <sup>2</sup> | 1                 | 6               | 462                | 2.74E-7     | 1.0627E-5   |
| CUE2                | <b>0.35</b>      | 1.3              | 1                 | 6               | 462                | 2.74E-7     | 1.0627E-5   |
| DOC_TAU2            | 0.5              | <b>60</b>        | 1                 | 6               | 462                | 2.74E-7     | 1.0627E-5   |
| Carbon_tau_active2  | 0.5              | 1.3              | <b>0.149</b>      | 6               | 462                | 2.74E-7     | 1.0627E-5   |
| Carbon_tau_slow2    | 0.5              | 1.3              | 1                 | <b>3</b>        | 462                | 2.74E-7     | 1.0627E-5   |
| Carbon_tau_passive2 | 0.5              | 1.3              | 1                 | 6               | <b>241</b>         | 2.74E-7     | 1.0627E-5   |
| Dif2                | 0.5              | 1.3              | 1                 | 6               | 462                | <b>1e-6</b> | 1.0627E-5   |
| D_DOC               | 0.5              | 1.3              | 1                 | 6               | 462                | 2.74E-7     | <b>1e-4</b> |

<sup>1</sup>Except for Hainich, where the default CUE is 0.35 and for the simulation CUE2, CUE is 0.5

<sup>2</sup>Except for Brasschaat, where the default DOC\_TAU is 60 and for the simulation DOC\_TAU2 is 1.3

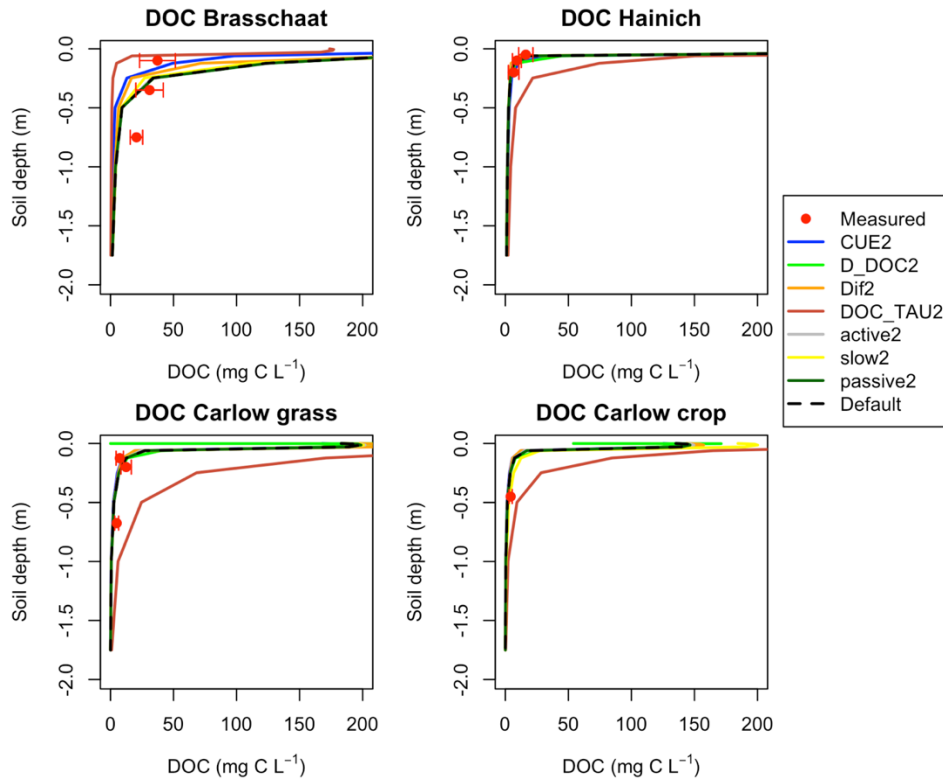

Figure S6. DOC concentrations along the soil profile simulated by the 7 sensitivity tests at the 4 studied sites.

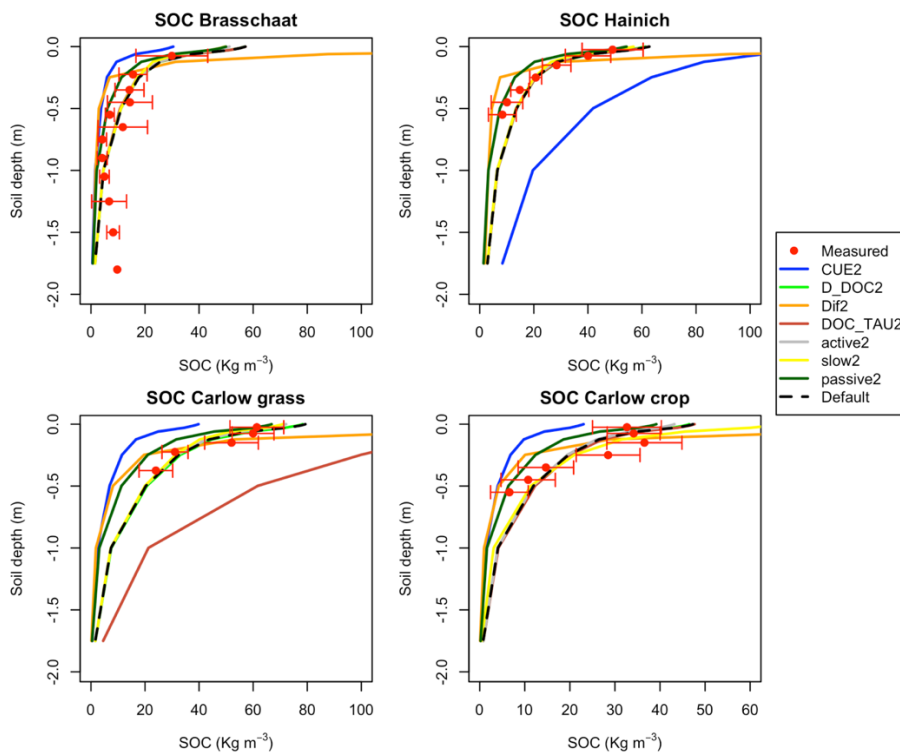

Figure S7. SOC stocks along the soil profile simulated by the 7 sensitivity tests at the 4 studied sites.

## References

- Kindler, R., Siemens, J., Kaiser, K., Walmsley, D. C., Bernhofer, C., Buchmann, N., Cellier, P., Eugster, W., Gleixner, G., Grunwald, T., Heim, A., Ibrom, A., Jones, S. K., Jones, M., Klumpp, K., Kutsch, W., Larsen, K. S., Lehuger, S., Loubet, B., McKenzie, R., Moors, E., Osborne, B., Pilegaard, K., Reemann, C., Saunders, M., Schmidt, M. W. I., Schrumpf, M., Seyfferth, J., Skiba, U., Soussana, J. F., Sutton, M. A., Tefs, C., Vowinkel, B., Zeeman, M. J. and Kaupenjohann, M.: Dissolved carbon leaching from soil is a crucial component of the net ecosystem carbon balance, *Glob. Chang. Biol.*, 17(2), 1167–1185, doi:DOI 10.1111/j.1365-2486.2010.02282.x, 2011.
- Walmsley, D. C., Siemens, J., Kindler, R., Kirwan, L., Kaiser, K., Saunders, M., Kaupenjohann, M. and Osborne, B. A.: Dissolved carbon leaching from an Irish cropland soil is increased by reduced tillage and cover cropping, *Agric. Ecosyst. Environ.*, 142(3), 393–402, doi:10.1016/j.agee.2011.06.011, 2011.
